# Supplementary material
Source: PubMed Central journal article supplement (PMC4741351)
Supplement: supp_pp.15.00310_310revsupp.pdf [file supp_pp.15.00310_310revsupp.pdf]

Supplemental Figures

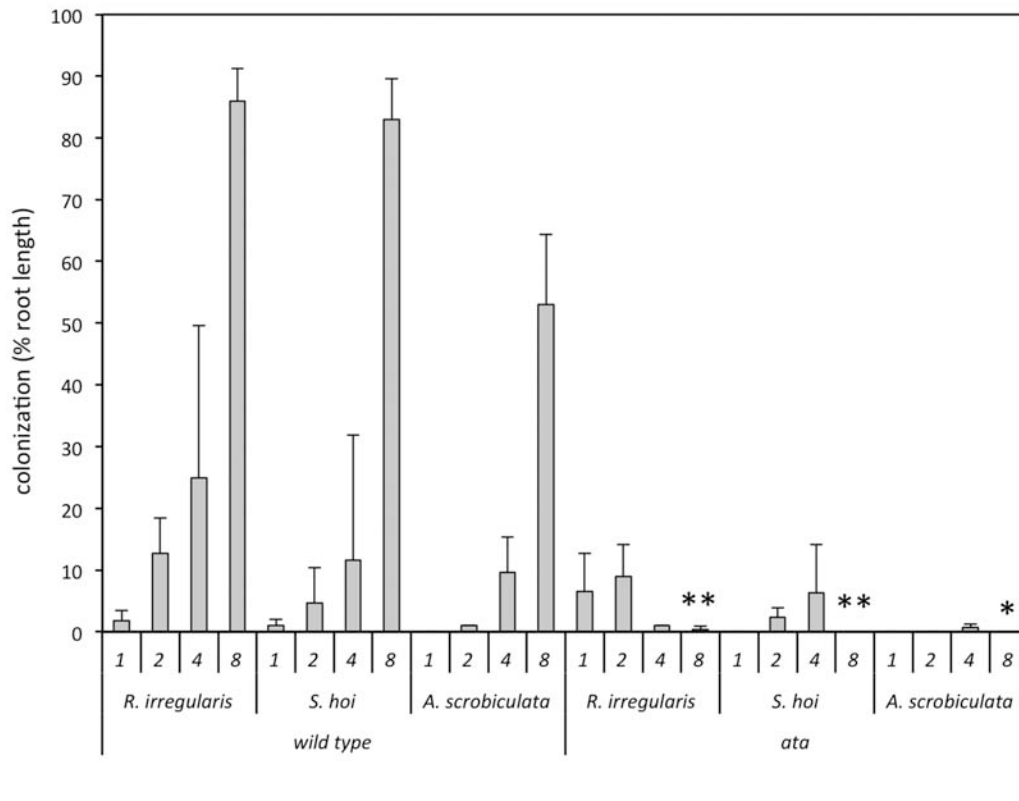

**Fig. S1. AM-defective phenotype of *ata* mutant in combination with diverse AM fungi**

AM root colonization of wild type (left) and *ata* mutant (right) inoculated with *Rhizophagus irregularis*, *Simiglomus hoi*, and *Acaulospora scrobiculata*. Total root colonization was assessed after 1, 2, 4, and 8 weeks. Columns represent the average of three biological replicates  $\pm$  standard deviation. Significant differences (Student's t-test) between the mutant and the wild type are indicated with asterisk (\*:  $p < 0.05$ ; \*\*:  $p < 0.01$ ).

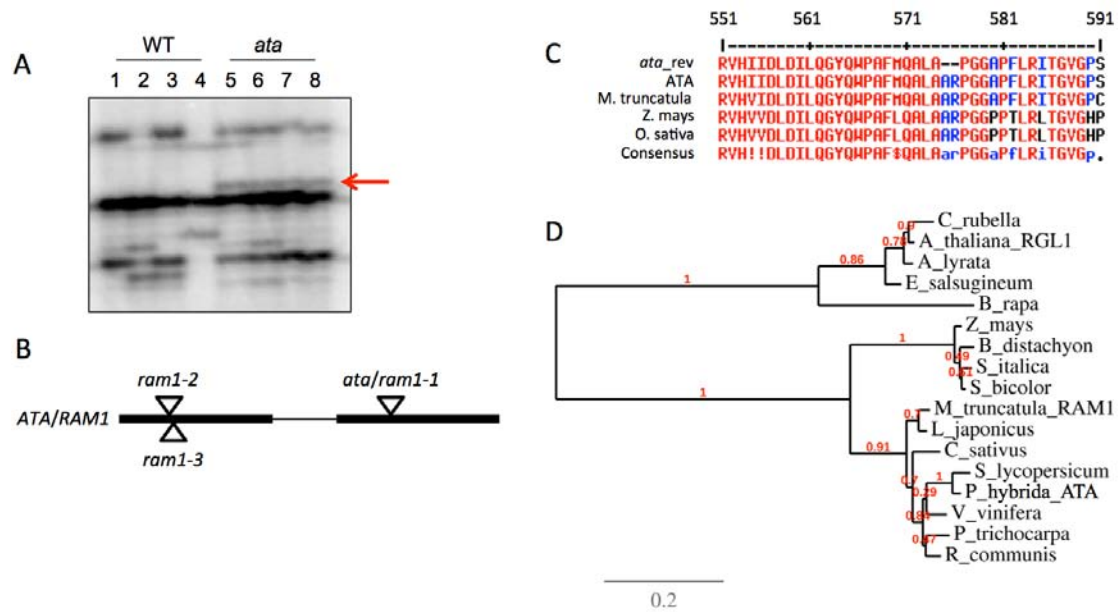

**Fig. S2. ATA encodes a conserved GRAS transcription factor**

(A) Identification of the *ata* mutant locus by transposon display. Red arrow indicates an amplicon that segregated perfectly with the mutant phenotype.

(B) Map of the wild type *ATA/RAM1* locus and the three *ram1* insertion alleles. Thick lines represent exons, the thin line represents the single intron. Arrows indicate the insertion sites of *dTph1* in the alleles *ata/ram1-1*, *ram1-2*, and *ram1-3*, respectively.

(C) Analysis of the revertant allele of *ata/ram1-1* in comparison with the respective sequence stretch of the wild type allele, as well as the closest homologues from *M. truncatula*, rice (*Oryza sativa*), and maize (*Zea mays*) (compare with **Figure S3**). Note a deletion of 2 amino acid residues in the revertant allele (*ata\_rev*) relative to the wild type allele (ATA).

(D) Phylogram of the predicted ATA protein from *P. hybrida* and RAM1 from *M. truncatula* together with the closest homologs from various monocot (*Zea mays*, *Brachypodium distachyon*, *Setaria italica*, *Sorghum bicolor*), and dicot species (*Capsella rubella*, *Arabidopsis thaliana*, *Arabidopsis lyrata*, *Lotus japonicus*, *Cucumis sativus*, *Solanum lycopersicum*, *Vitis vinifera*, *Populus trichocarpa*, and *Ricinus communis*). The distance bar indicates the number of substitutions per site.



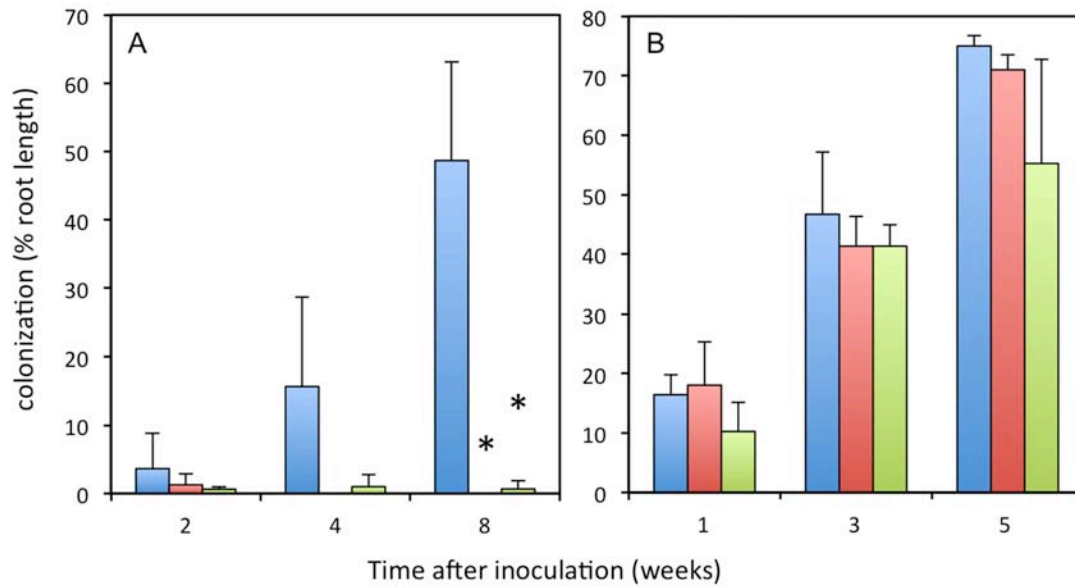

**Fig. S4. Colonization of *ram1-2* and *ram1-3* by *R. irregularis***

A) Total root colonization in wild type *Petunia hybrida* (blue), *ram1-2* (red), and *ram1-3* (green), inoculated with *R. irregularis* spore inoculum.

B) Total root colonization in the wild type (blue), *ram1-2* (red), and *ram1-3* (green), colonized from nurse-plants with *R. irregularis*.

Columns represent the average of five biological replicates  $\pm$  standard deviation.

Significant differences (Student's t-test) between the mutant and the wild type are indicated with asterisk (\*:  $p < 0.05$ )

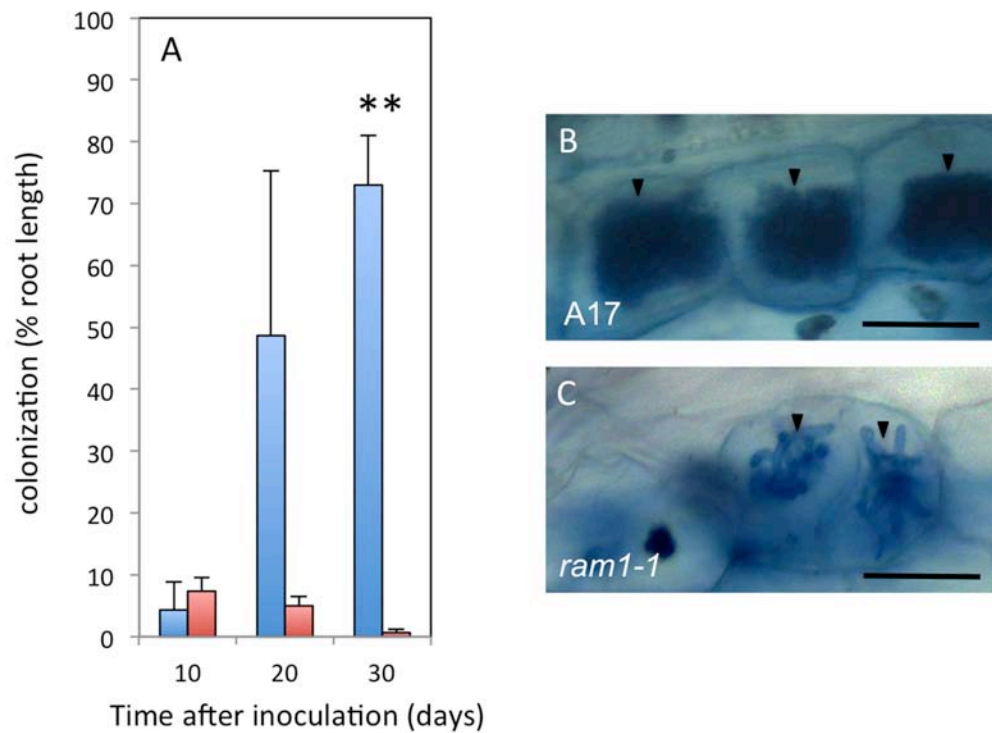

**Fig. S5. AM-defective phenotype of *M. truncatula ram1-1***

A) Total root colonization of *R. irregularis* in *M. truncatula* wild type (Line A17; blue) and in *ram1-1* (red).

B) Wild type *M. truncatula* root (line A17) colonized by *R. irregularis*. Arbuscules are indicated by arrowheads.

C) Root of *M. truncatula ram1-1* mutant inoculated with *R. irregularis*. Note the aberrant arbuscules (arrowheads). Size bars: 50  $\mu\text{m}$  in B,C.

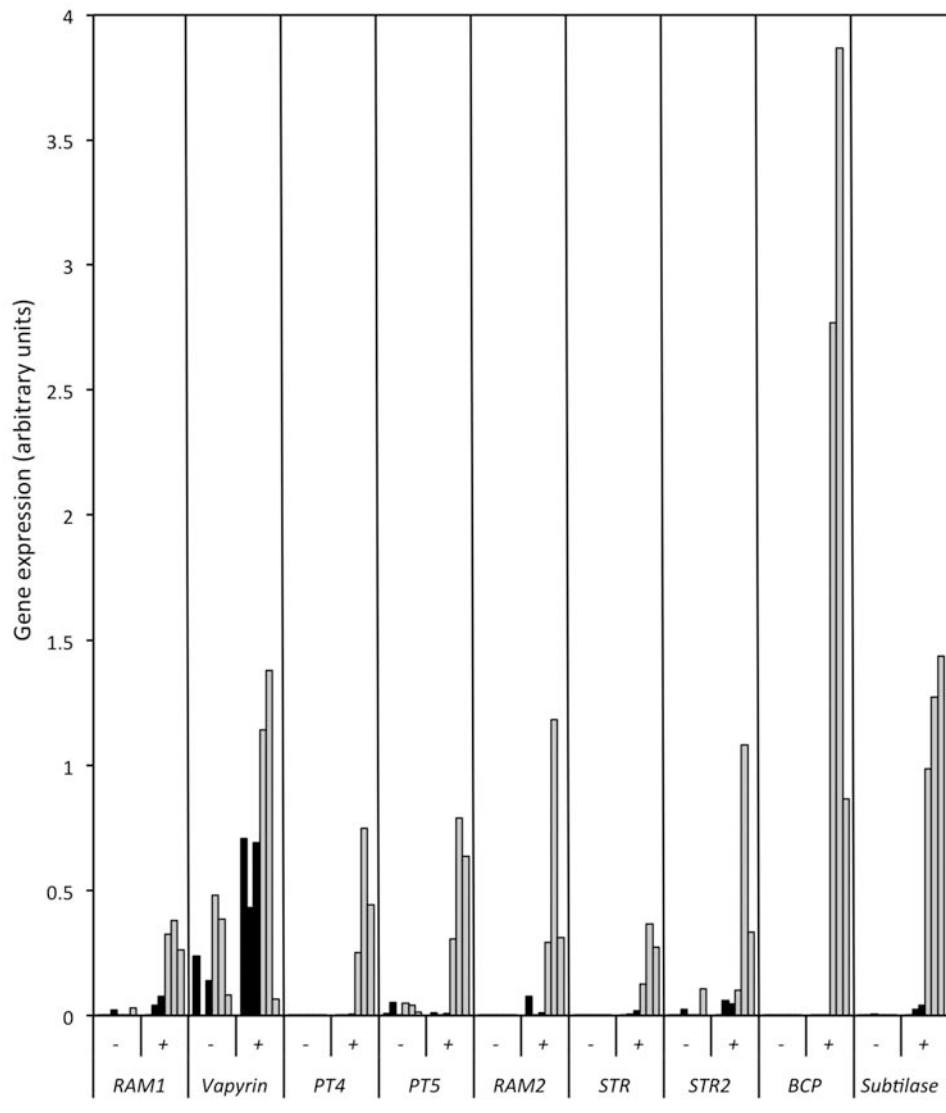

**Fig. S6. Expression of AM marker genes in the *ata* mutant**

Gene expression was determined by real time quantitative RT-PCR in non-mycorrhizal control roots (-), and in colonized roots (+) of the wild type (grey bars), and in *ata* mutants (black bars). Each bar represents an individual replicate plant.

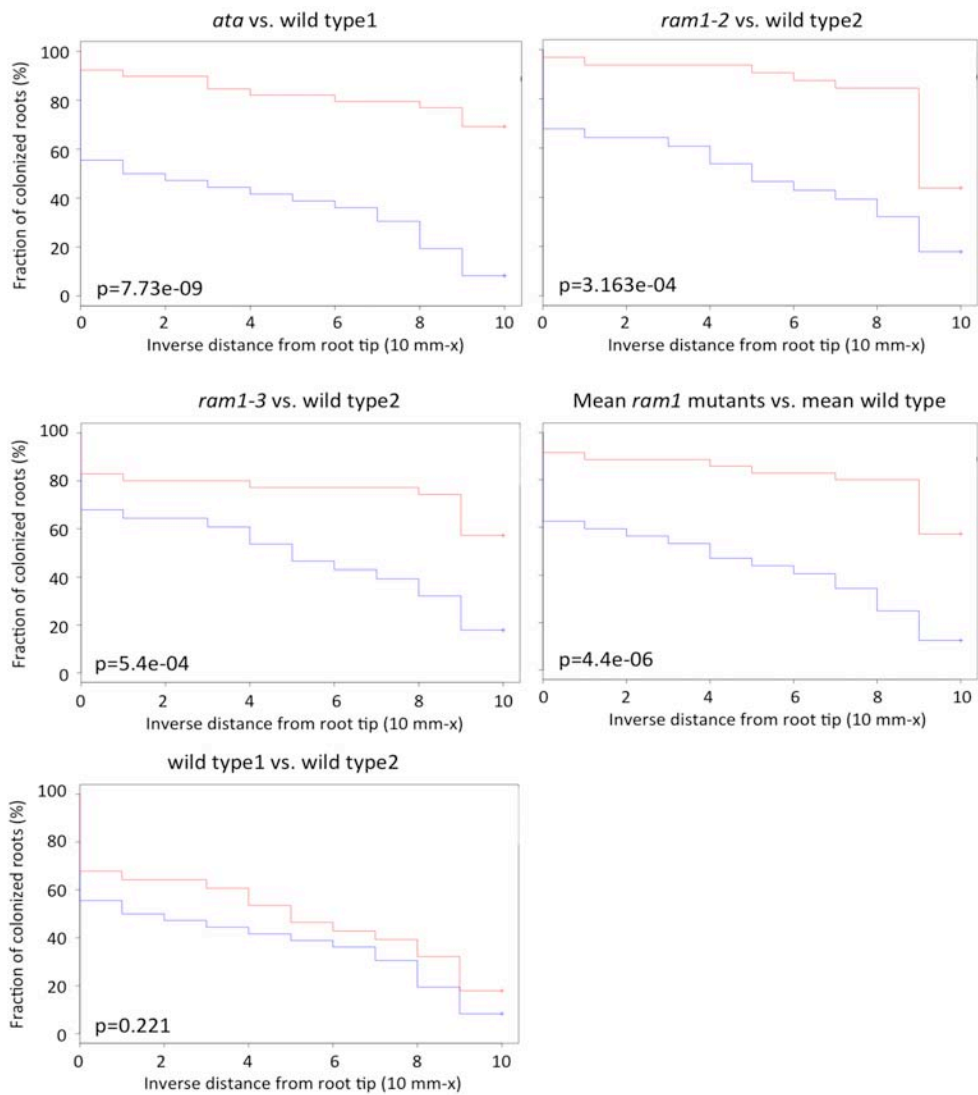

**Fig. S7. Statistical analysis of fungal colonization of the root tip**

The data shown in Figure 4D,E was transformed into survival curves. Log-rank test was performed to assess the significance of the difference between the curves. A p-value  $<0.05$  is considered statistically significant. From top left to bottom right: *ata/ram1-1* vs. wt1, *ram1-2* vs. wt2, *ram1-3* vs. wt2, mean mutants vs. mean wt, wt1 vs wt2. Blue curves represent the wt, red curves represent the mutants. In (E), the blue curve represents wt1, the red curve wt2

|         | W115-a    | <i>ata/ram1-1</i> |           |         | W115-b    | <i>ram1-2</i> |           |         | <i>ram1-3</i> |           |         |
|---------|-----------|-------------------|-----------|---------|-----------|---------------|-----------|---------|---------------|-----------|---------|
|         | expr.     | expr.             | fold less | p-value | expr.     | expr.         | fold less | p-value | expr.         | fold less | p-value |
| RAM1    | 321,851   | 39,087            | 8         | 0.0022  | 373,127   | 75,857        | 5         | 0.0220  | 22,255        | 17        | 0.0081  |
| Vapyrin | 1,146,643 | 609,847           | 2         | 0.0290  | 1,327,435 | 652,040       | 2         | 0.2606  | 885,166       | 1         | 0.4145  |
| PT4     | 481,117   | 2,078             | 231       | 0.0302  | 979,081   | 16,216        | 60        | 0.0042  | 2,009         | 487       | 0.0040  |
| PT5     | 577,052   | 6,933             | 83        | 0.0161  | 706,846   | 43,167        | 16        | 0.0036  | 19,208        | 37        | 0.0032  |
| RAM2    | 597,126   | 3,554             | 168       | 0.1136  | 683,175   | 11,277        | 61        | 0.0126  | 1,410         | 485       | 0.0119  |
| STR     | 255,319   | 8,981             | 28        | 0.0247  | 161,650   | 10,121        | 16        | 0.0315  | 8,422         | 19        | 0.0298  |
| STR2    | 505,049   | 35,359            | 14        | 0.1887  | 232,375   | 63            | 3718      | 0.0148  | 4,083         | 57        | 0.0158  |
| BCP     | 2,501,280 | 593               | 4215      | 0.0463  | 2,800,029 | 67,416        | 42        | 0.0247  | 71,418        | 39        | 0.0248  |
| Sbt     | 1,232,482 | 22,039            | 56        | 0.0008  | 4,642,693 | 42,972        | 108       | 0.0207  | 980           | 4,737     | 0.0201  |

**Table S1. Expression of AM marker genes in the *ata/ram1* mutants**

Expression of the indicated genes was analyzed in plants inoculated for 1 week with *R. irregularis* nurse-plant inoculum. Gene expression was analyzed in the wild type and the three petunia *ram1* alleles relative to GAPDH expression. Gene expression values represent the mean of three independent biological replicates. Comparison between the mutants and the respective wild type plants revealed to which degree gene expression was reduced due to the respective *ram1* mutation (fold less), and p-values (t-test) indicate significant differences.



**Rich et al., Supplemental Information**

| <b>Gene</b> | <b>Primer name</b> | <b>Primer sequence</b>        |
|-------------|--------------------|-------------------------------|
| GAPDH       | PhGAPDH-F3         | GGAATCAACGGTTTTGGAAGAATTGGGCG |
|             | PhGAPDH-R4         | GGCCGTGGACACTGTCATACTTGAACA   |
| RAM1        | PhRAM1-F           | ACTGGTGCACCTTCTCCTTG          |
|             | PhRAM1-R           | GGGTCACGACACGATTCAG           |
| RAM2        | PhRAM2-F           | GCCCATGAGCCAAGACAAG           |
|             | PhRAM2-R           | CATGCCAAGAGGAAACCAAC          |
| PT4         | PhPT4-F            | ATCTTTGCAGGGCTGGTTTC          |
|             | PhPT4-R            | ATCTTTGCAGGGCTGGTTTC          |
| PT5         | PhPT5-F            | ACATTTGTGCTCCCTGCTGA          |
|             | PhPT5-R            | CTAAGAGCGTGGCATGTTGA          |
| STR         | PhSTR-F            | CCAACGCGAAAGCTAATTCC          |
|             | PhSTR-R            | TCACCTCTCAAGGCTTGTCC          |
| STR2        | PhSTR2-F           | TGGTGAACGTCGTAGGGTCT          |
|             | PhSTR2-R           | ACACTGTGAGCACTGGTGGA          |
| Vapyrin     | PhVapyrin-F        | CATTGTGCAGTGGAATCTGG          |
|             | PhVapyrin-R        | CTTTTGTTCACACCTTGC            |
| Subtilase   | Sbt_CL206          | TTGGCAAGTCCAGGCATAGT          |
|             | Sbt_CL206          | ATGTCAGATCGGTGCCAGTT          |
| BCP         | BCP_CL85_F         | TGGAGGAGGAGCTATGCAGTT         |
|             | BCP_CL85-R         | GGCTGGACCATTGATGTTGA          |

**Table S2: Primers used for real time qPCR**

**R script for statistical analysis of fungal root tip colonization:**  
(see Figure 4 and Figure S7)

```
library(survival)
#small function to invert the results of counts into a survival curve
invert_curve<-function(a) {
j=a[1];
d=0;
e=1;
x=0;
b=0;
for (i in 1:length(a)) {
  for (k in e:j) {
    b[k]=length(a)-i;
    x[k]=d;
  }
  d=1;
  e=j+1;
  j=a[i+1];
}
return(list(time=b,status=x));
}

#mutant 566
wtdata=c(5,9,11,12,13,15,17,19,19,19,28)
wt=invert_curve(wtdata)
mutdata=c(14,27,28,28,30,30,31,31,31,31,32)
mut=invert_curve(mutdata)

fit1 <- survfit(Surv(wt$time, wt$status) ~ 1)
fit2 <- survfit(Surv(mut$time, mut$status) ~ 1)
plot(fit1,conf.int="none", col ='blue', xlab = 'Inverse root tip distance (10mm-x)', ylab
= '% presence of mycorrhize')
lines(fit2, conf.int="none",col = 'red')
```

```

legend(8,1,c('Group 1 (WT)', 'Group 2 (Mutant)'), col = c('blue','red'), lty = 1)
title(main='KM-Curves for Mycorrhize Data mutant 566')

wt$group = 1
mut$group = 2
wt.df=data.frame(wt)
mut.df=data.frame(mut)
data = rbind(wt.df, mut.df)
survdif(Surv(time,status) ~ group, data=data)

#mutant 568
mutdata2=c(20,26,27,28,28,28,28,29,29,29,35)
mut=invert_curve(mutdata2)

fit1 <- survfit(Surv(wt$time, wt$status) ~ 1)
fit2 <- survfit(Surv(mut$time, mut$status) ~ 1)
plot(fit1,conf.int="none", col ='blue', xlab = 'Inverse root tip distance (10mm-x)', ylab
= '% presence of mycorrhize')
lines(fit2, conf.int="none",col = 'red')
legend(8,1,c('Group 1 (WT)', 'Group 2 (Mutant)'), col = c('blue','red'), lty = 1)
title(main='KM-Curves for Mycorrhize Data mutant 568')

wt$group = 1
mut$group = 2
wt.df=data.frame(wt)
mut.df=data.frame(mut)
data = rbind(wt.df, mut.df)
survdif(Surv(time,status) ~ group, data=data)

#mutant ata
wtdata=c(3,7,11,13,14,15,16,17,18,20,36)
wt=invert_curve(wtdata)
mutdata3=c(27,31,31,32,32,33,33,35,36,36,39)

```

```

mut=invert_curve(mutdata3)

fit1 <- survfit(Surv(wt$time, wt$status) ~ 1)
fit2 <- survfit(Surv(mut$time, mut$status) ~ 1)
plot(fit1,conf.int="none", col ='blue', xlab = 'Inverse root tip distance (10mm-x)', ylab
= '% presence of mycorrhize')
lines(fit2, conf.int="none",col = 'red')
legend(8,1,c('Group 1 (WT)', 'Group 2 (Mutant)'), col = c('blue','red'), lty = 1)
title(main='KM-Curves for Mycorrhize Data mutant ata')

wt$group = 1
mut$group = 2
wt.df=data.frame(wt)
mut.df=data.frame(mut)
data = rbind(wt.df, mut.df)
survdif(Surv(time,status) ~ group, data=data)

#mean values (3 mutants, 2 wt)
wtmean=c(4,8,11,13,14,15,17,18,19,20,32)
wt=invert_curve(wtmean)
mutmean=c(20,28,29,29,30,30,31,32,32,32,35)
mut=invert_curve(mutmean)

fit1 <- survfit(Surv(wt$time, wt$status) ~ 1)
fit2 <- survfit(Surv(mut$time, mut$status) ~ 1)
plot(fit1,conf.int="none", col ='blue', xlab = 'Inverse root tip distance (10mm-x)', ylab
= '% presence of mycorrhize')
lines(fit2, conf.int="none",col = 'red')
legend(8,1,c('Group 1 (WT)', 'Group 2 (Mutant)'), col = c('blue','red'), lty = 1)
title(main='KM-Curves for Mycorrhize Data mutant Mean values')

wt$group = 1
mut$group = 2
wt.df=data.frame(wt)

```

```

mut.df=data.frame(mut)
data = rbind(wt.df, mut.df)
survdif(Surv(time,status) ~ group, data=data)

wtdata1=c(3,7,11,13,14,15,16,17,18,20,36)
wt=invert_curve(wtdata1)
wtdata2=c(5,9,11,12,13,15,17,19,19,19,28)
mut=invert_curve(wtdata2)

fit1 <- survfit(Surv(wt$time, wt$status) ~ 1)
fit2 <- survfit(Surv(mut$time, mut$status) ~ 1)
plot(fit1,conf.int="none", col ='blue', xlab = 'Inverse root tip distance (10mm-x)', ylab
= '% presence of mycorrhize')
lines(fit2, conf.int="none",col = 'red')
legend(8,1,c('Group 1 (WT)', 'Group 2 (Mutant)'), col = c('blue','red'), lty = 1)
title(main='KM-Curves for Mycorrhize Data wt1 vs wt2 comparison')

wt$group = 1
mut$group = 2
wt.df=data.frame(wt)
mut.df=data.frame(mut)
data = rbind(wt.df, mut.df)
survdif(Surv(time,status) ~ group, data=data)

```
